# Supplementary material for: An intrinsically labile α-helix abutting the BCL9-binding site of β-catenin is required for its inhibition by carnosic acid
Source: PubMed Central journal article supplement — Nat Commun. 2012 Feb 21;3:680–. doi: 10.1038/ncomms1680 (PMC3293410; doi:10.1038/ncomms1680), 2012-02-21
Supplement: ncomms1680-s1.pdf [file ncomms1680-s1.pdf]

## SUPPLEMENTARY INFORMATION

### Supplementary Figure S1

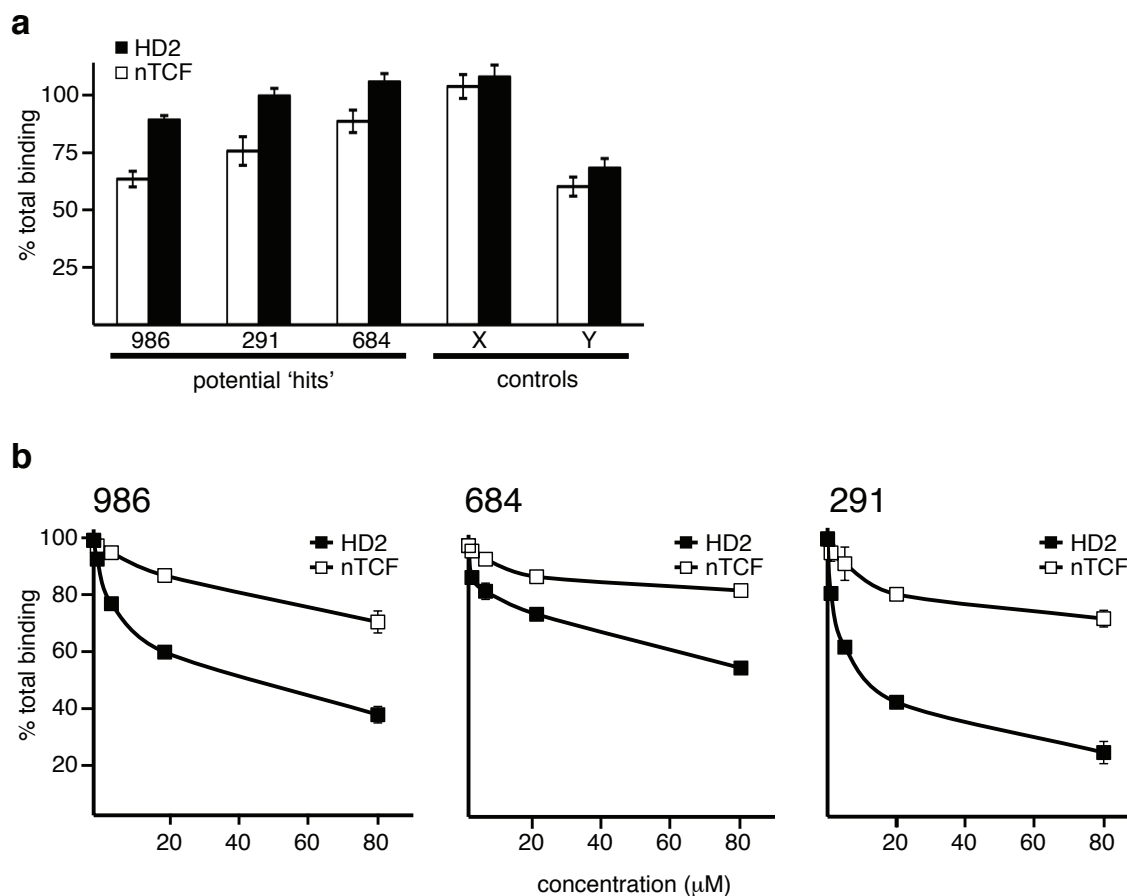

#### *In vitro* inhibitor activities of Phytopure hits

**(a)** Inhibition values (percent ARD-HD2 binding after incubation of compound relative to total binding without compound) for 20 μM 986, 291 and 684 in ELISA assays; two compounds (X and Y) are shown as (X) negative in the primary screen, or (Y) positive in both screens; error bars, standard deviations (n=4). **(b)** ELISA assays, showing dose-dependent inhibitions of the ARD-HD2 and ARD-nTCF interactions by 20 μM of compound (986, 291 or 684).

## Supplementary Figure S2

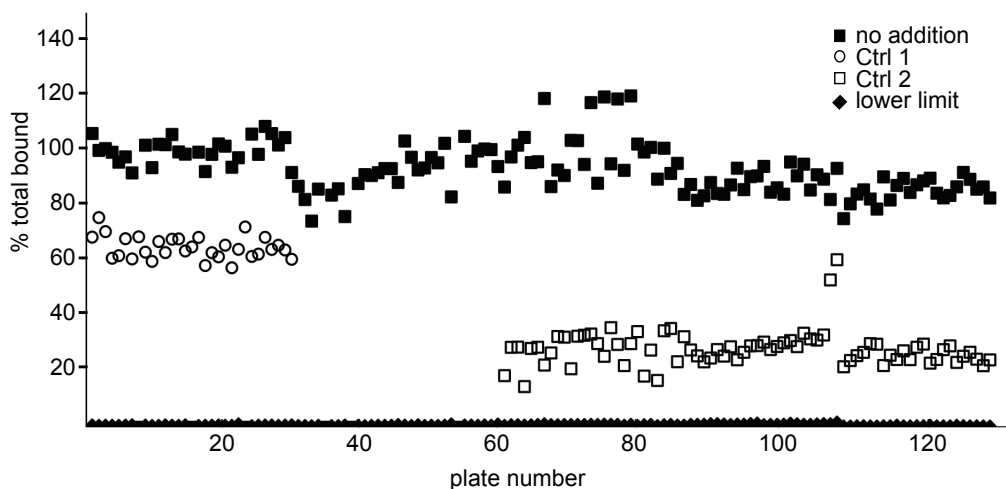

### Medium throughput screen of the MRCT library

Scan of 135 different 384-well plates, showing upper limit control values derived from wells with no addition of compound (■), and lower limit values (◆) derived from wells coated with GST instead of GST-ARD (unable to bind His-HD2). Two control (Ctrl) compounds from the LOPAC screen (Ctrl 1, aurintricarboxylic acid; Ctrl 2, 6-hydroxy DL DOPA, also known as 2,5-dihydroxy-DL-tyrosine) that scored in the primary and counter screens were used as internal controls in the majority of plates and at 20  $\mu$ M yielded 30% (Ctrl 1, ○) and 65% (Ctrl 2, □) inhibition of the HD2-ARD interaction, respectively. For automation of this screen, a Biomek Fx automated liquid handling robot (Beckman) coupled to a Biotek plate washer was used. Volumes of protein and compound were 20  $\mu$ l, and starting concentrations of GST-proteins were 2  $\mu$ g. Detection of the HRP signal was luminescent-based, developed with 25  $\mu$ l of POD reagent (Pierce), and quantified on a PHERAstar fluorescence plate reader (BMG Labtech). A hit was defined as a compound that inhibited binding by >60% or >3 standard deviations of the DMSO control, whichever the greater in two independent tests. Hits were re-tested in the counter-screen as described.

### Supplementary Figure S3

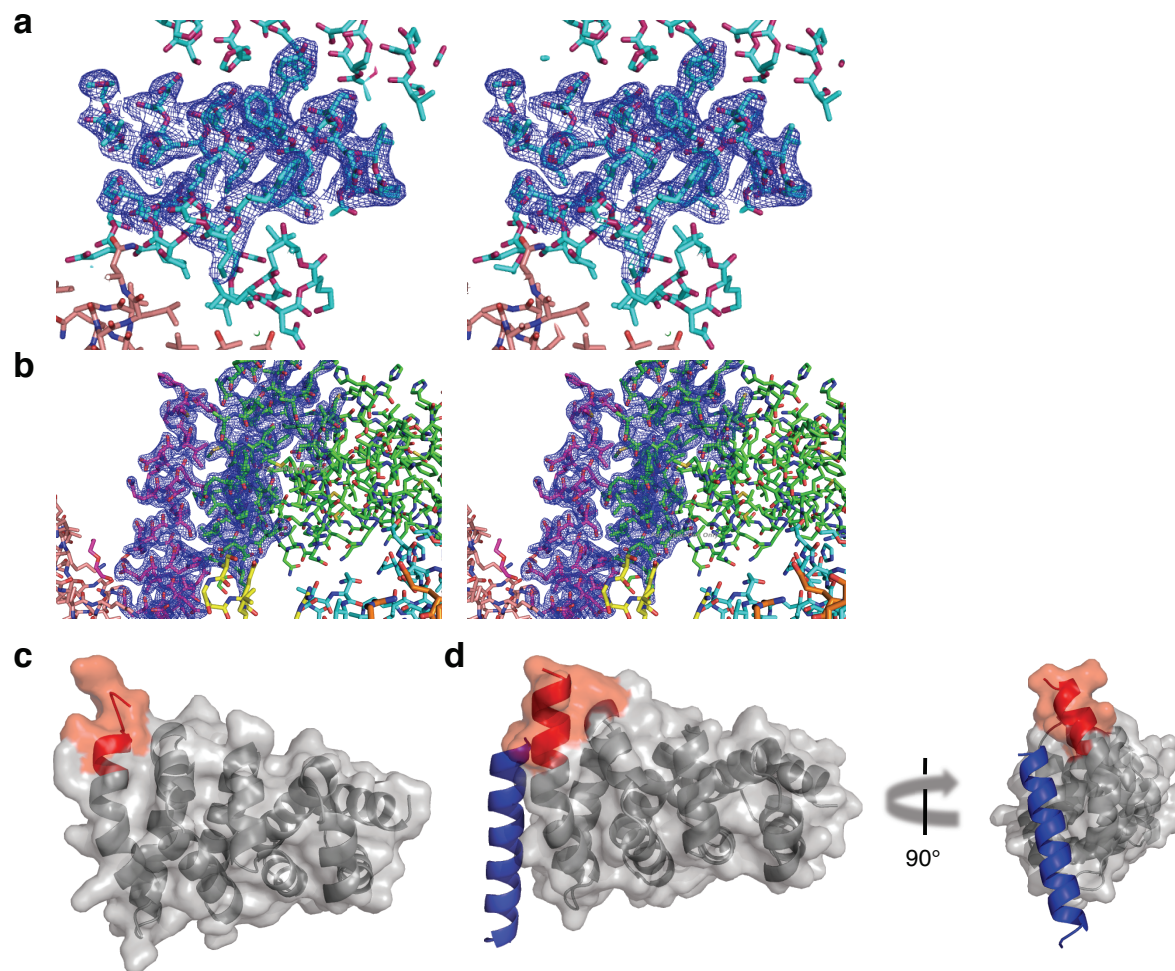

### X-ray structures of R4 and R4-HD2

(a, b) Stereo images of (a) 3SLA (R4 structure) and (b) 3SL9 (R4-HD2 structure), with electron density maps contoured at  $1.0\sigma$ , around the selection site, within  $1.6 \text{ \AA}$  of selected atoms based on the  $2F_o - F_c$  map. (c, d) Molecular surfaces and superimposed ribbon representations of (c) R4 and (d) R4-HD2 (images created with PyMOL); grey, R4 (with H1 in red); blue, HD2. Note the HD2-induced conformational change of H1 which is (c) largely unstructured in the apo form (i.e. there is no electron density for H1 amino acid side chains, and the observed backbone-derived electron densities are due to artificial crystal contacts), but adopts a helical structure upon HD2 binding (d), similar to that previously observed in the ARD-HD2-nTCF complex<sup>18</sup>.

### Supplementary Figure S4

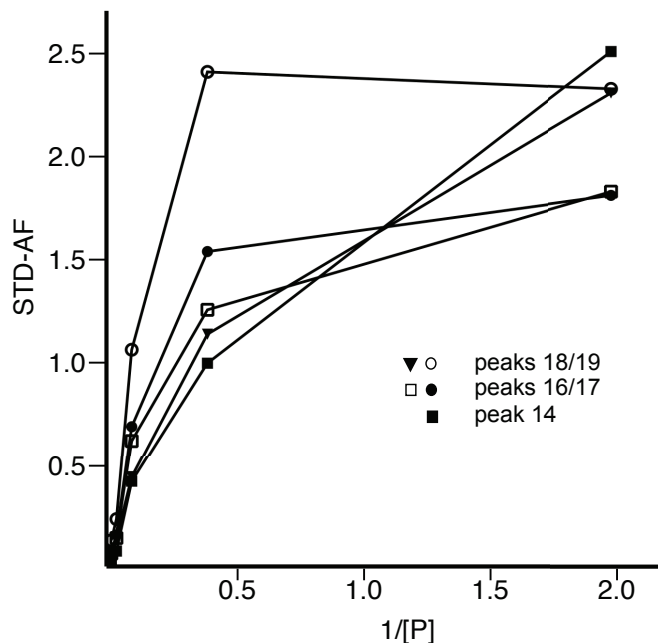

### Quantitation of CA binding to R4 monitored by STD

Binding isotherms for STD amplification factors versus  $1/[P]$ , where STD-AF is defined as  $(I_o - I_{STD})/I_o * ([L]/[P])^{20}$ ;  $I_o$  and  $I_{sat}$ , NMR peak heights of individual CA protons (H14, H16-H19; see main **Figure 2d**) measured after 7 seconds off-resonance and on-resonance saturating irradiation, respectively;  $[P]$ , total protein concentration (0.5-50 $\mu$ M);  $[L]$ , total ligand concentration (fixed at 50 $\mu$ M); the prochiral methyl group proton resonances of H16/H17 and H18/H19 were not assigned stereospecifically. The plateau of STD-AF at low protein concentrations and the decreasing STD-AF values at higher concentrations indicate that the binding of R4 to CA is saturable.



## Supplementary Figure S5

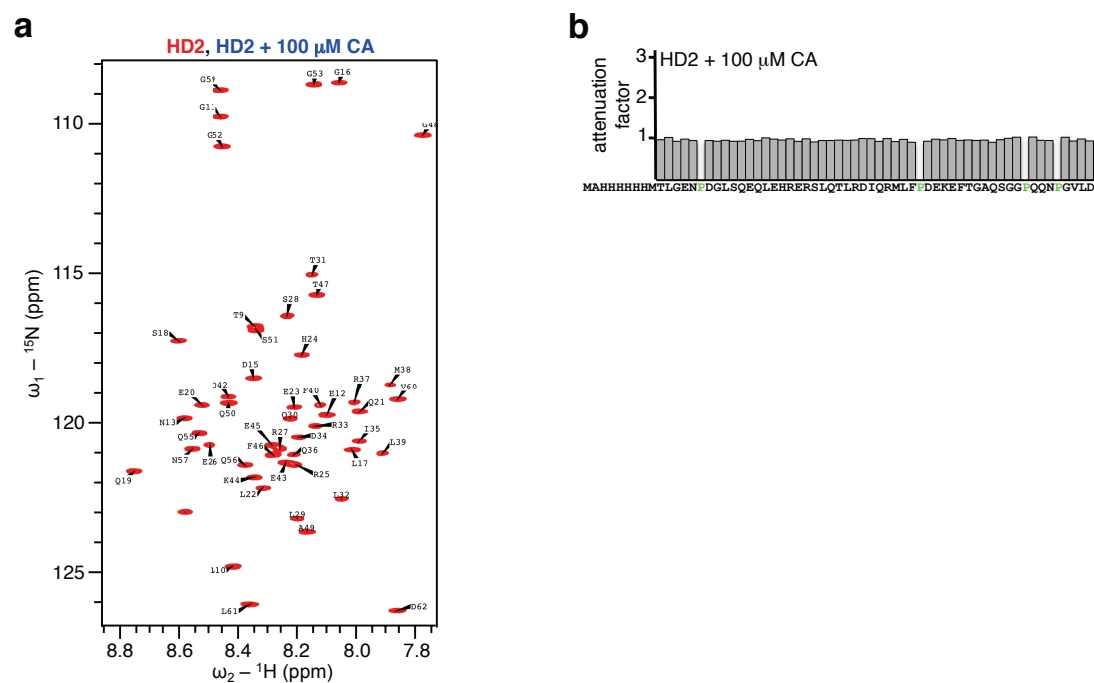

## The HSQC of HD2 is unperturbed by CA

(a) Overlay of assigned HSQC of  $^{15}$ N-labelled HD2+CA (100  $\mu$ M each) onto  $^{15}$ N-labelled HD2 (100  $\mu$ M) in solvent only, as indicated. Assignment of 49 non-proline HD2 residues (plus one residue from the N-terminal tag) was obtained for  $^{13}$ C/ $^{15}$ N double-labelled protein at 20°C, 500 MHz  $^1$ H (see also **Supplementary Figure S6**). (b) Map of CA-induced relative intensity changes derived from (a) onto individual HD2 residues; attenuation factors were calculated as in main **Figure 3**; green, prolines.

## Supplementary Figure S6

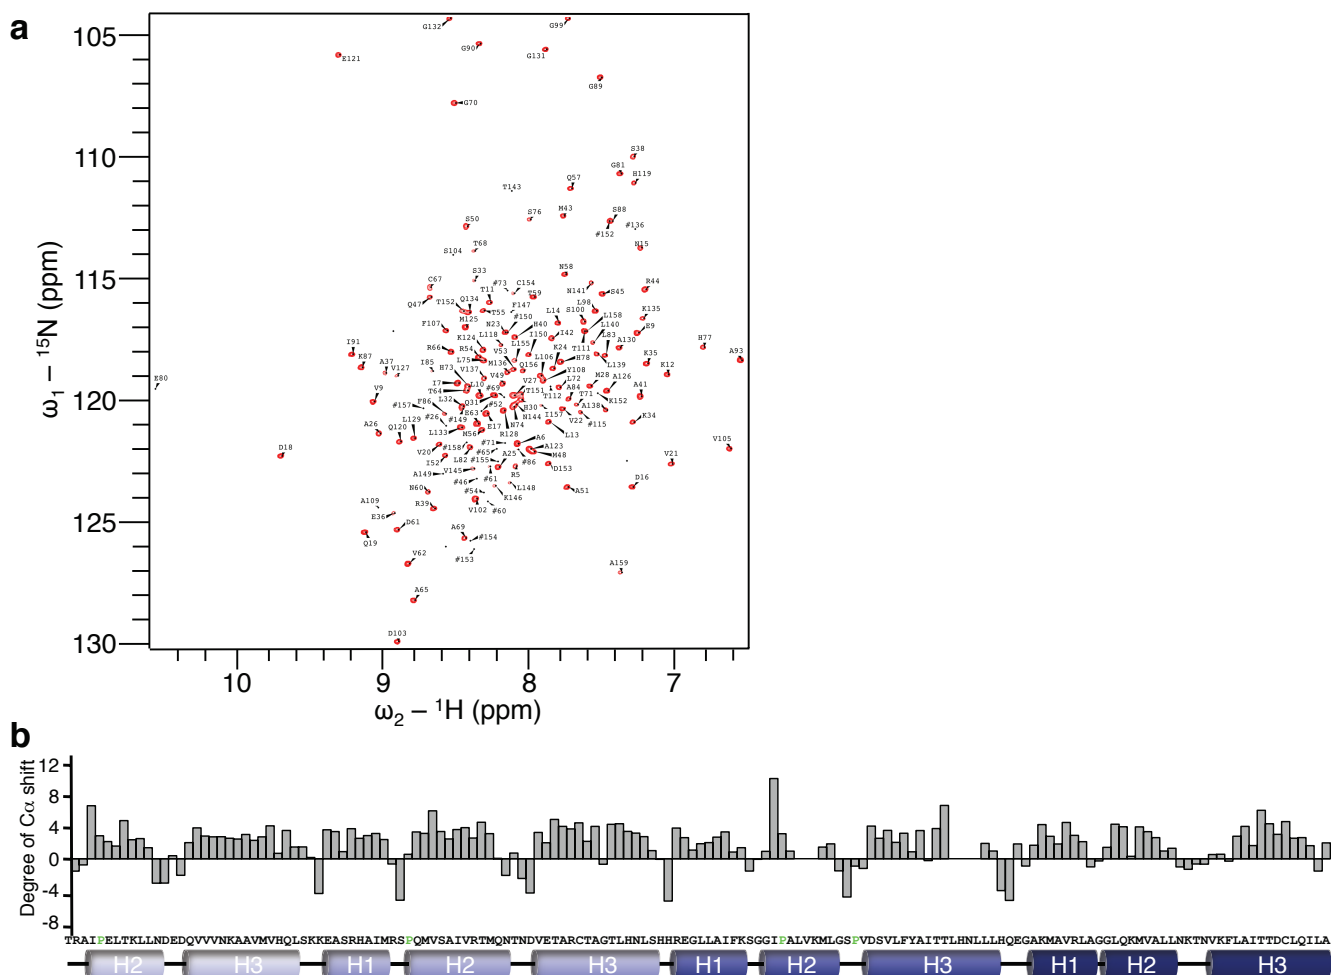Assigned HSQC of R4 <sup>$\Delta$ H1</sup> and secondary structure elements

(a) Resonance assignments of 138 non-proline residues were obtained with 300  $\mu\text{M}$   $^2\text{H}/^{13}\text{C}/^{15}\text{N}$  triple-labelled R4 <sup>$\Delta$ H1</sup> at 15°C 600 MHz  $^1\text{H}$ , using standard TROSY-based triple resonance correlation spectra (trHNCA, trHN(CO)CA, trHN(CA)CB, trHN(COCA)CB, trHNCO & trHN(CA)CO, with unmodified Bruker pulse programs); the remaining 13 residues (in the third repeat, dark blue helices in main **Figure 3c**) remained unassigned due to localised inefficient magnetisation transfer. (b) Correlation of resonance assignments with secondary structure likelihood, based on TALOS+<sup>21</sup>, with R4 sequence (underneath) and its  $\alpha$ -helices as observed in the crystal structure (see **Supplementary Figure S3**);  $\text{C}\alpha$ ,  $\alpha$ -carbon.

**Supplementary Figure S7**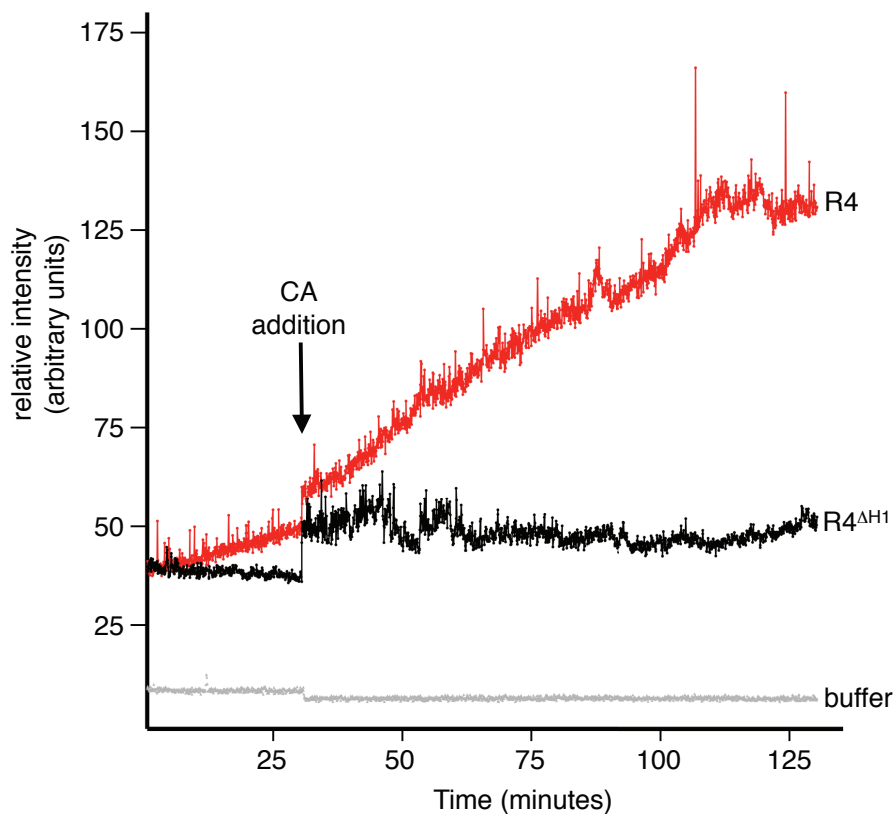**CA induces aggregation of R4 but not R4<sup>ΔH1</sup>**

Kinetics of emission intensity changes of scattered light from samples of 25  $\mu\text{M}$  R4 (red) or R4<sup>ΔH1</sup> (black), or from buffer alone (grey), based on excitation and emission wavelengths of 350 nm. Right-angle light scattering was recorded (with a Cary Eclipse fluorescence spectrophotometer) for 100 minutes after addition of 25  $\mu\text{M}$  CA, following establishment of baseline light scattering for 30 minutes at 25°C.

## Supplementary Figure S8

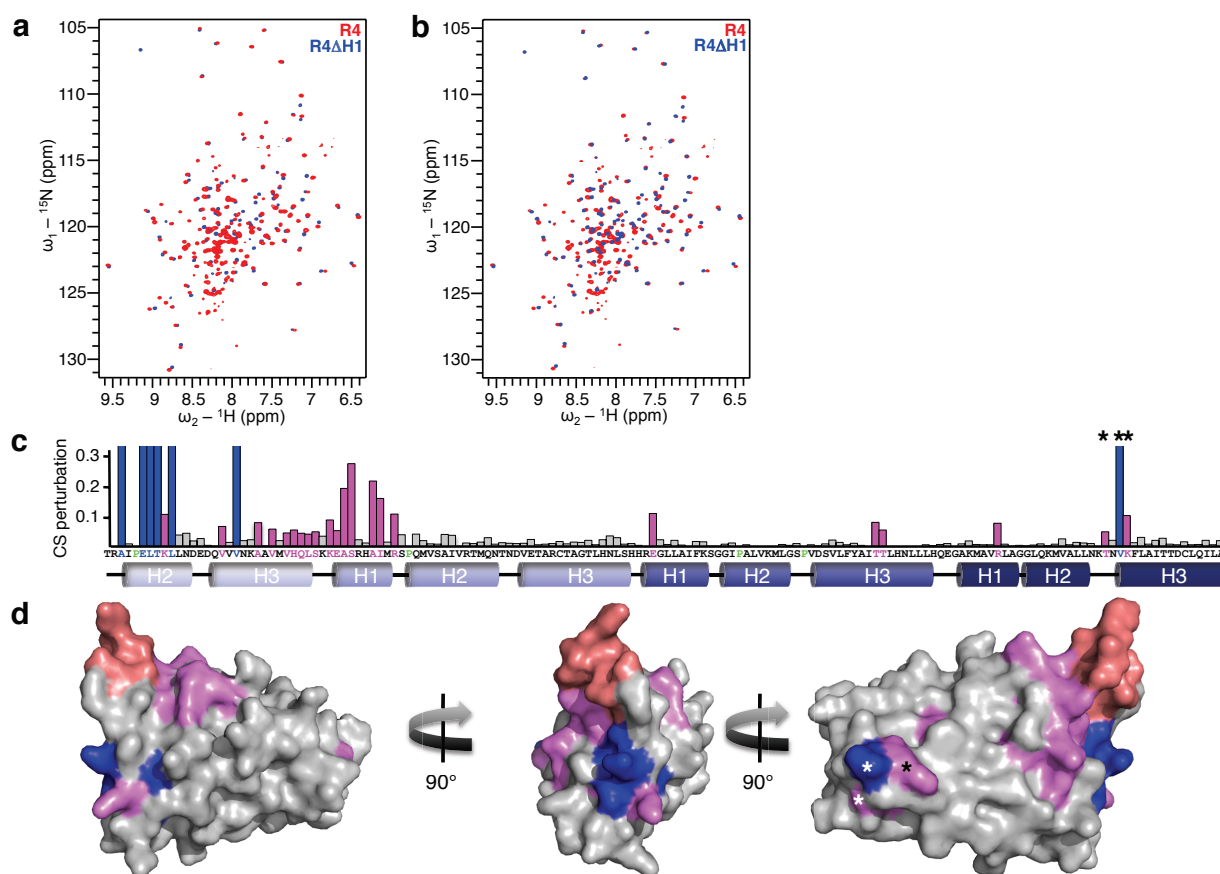HSQC spectral similarity of R4 and R4<sup>ΔH1</sup>

(a, b) Overlay of TROSY spectra of <sup>15</sup>N-labelled (a) R4 (red) onto R4<sup>ΔH1</sup> (blue; 100 μM each) and (b) inverted display. (c) Weighted chemical shift (CS) perturbations, indicating shifting of >0.05 ppm (purple) or line broadening (blue) of residues along the amino acid sequence (secondary structure elements underneath). Lack of a bar, proline (green) or unassigned residue (in the third repeat). (d) Projection of CS perturbations onto the R4 structure (colour coding as in c); the majority of these cluster in repeat 1 and in the first α-helix of repeat 2, which is structurally adjacent to H1 (red), indicative of perturbations experienced by this region by the presence of H1. A small surface-exposed patch (asterisks) revealed by chemical shifts of residues in the third α-helix of repeat 4 suggests that this patch may participate in R4 oligomerisation or aggregation (not observed with R4<sup>ΔH1</sup>). The prominent valine in this patch (blue) is also solvent-exposed in the structure of the intact ARD<sup>19</sup>.

## Supplementary Figure S9

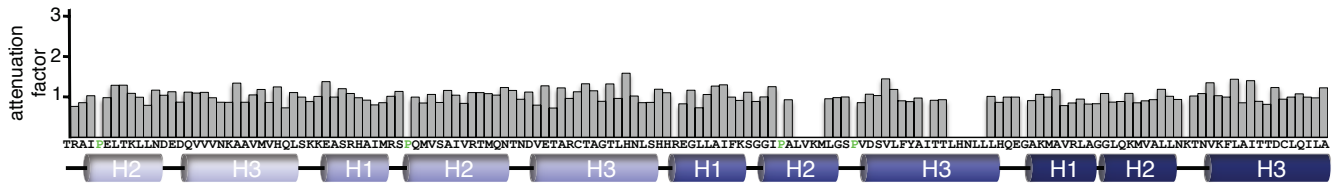

### R4<sup>ΔH1</sup> fails to respond to CA

Attenuation factors (calculated as described in main **Figure 3d**) derived from the HSQC spectral overlays shown in main **Figure 4a** (100  $\mu\text{M}$   $^{15}\text{N}$ -labelled R4<sup>ΔH1</sup> +/- 100  $\mu\text{M}$  CA) with regard to individual R4 residues; colour coding as in main **Figure 3d**. No significant changes were observed (attenuation factors  $\sim 1$  throughout the spectrum).

## Supplementary Figure S10

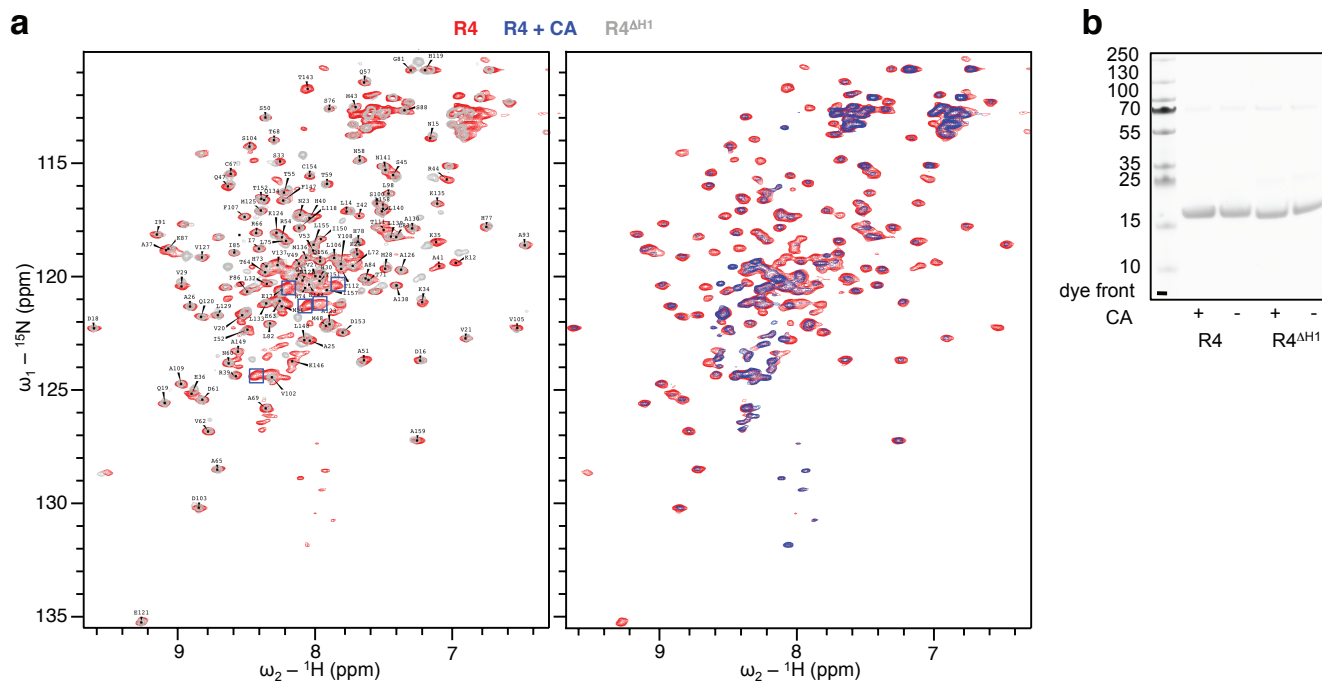

## Putative H1 residues responding to CA

**(a)** Double and triple overlays of HSQCs from  ${}^{15}\text{N}$ -labelled R4<sup>ΔH1</sup> (shown in main **Figure 4a**, red), R4 and R4+CA (shown in main **Figure 3c**); left-hand panel, grey on red (with annotations of assigned peaks; see **Supplementary Figure S6**); right-hand panel, grey on blue on red; boxed are major unassigned R4-specific peaks (red, but not grey) that are candidates for poorly structured H1 residues (as they appear in the 8.0-8.6 ppm range). A subset of these experience CA-induced line broadenings or slight chemical shift perturbations (compare red and blue in right-hand panel), consistent with direct interactions of these putative H1 residues with CA. The high similarity of the three spectra indicates that the overall R4 fold remains the same after CA addition, arguing against proteolysis as a major factor in the CA response of R4. **(b)** SDS-PAGE of  ${}^{15}\text{N}$ -labelled R4 and R4<sup>ΔH1</sup>, +/- CA, confirming absence of detectable proteolysis from the NMR samples (faint bands at ~70 kDa represent minor impurities); molecular masses (kDa) are indicated by numbers on the left.

## Supplementary Figure S11

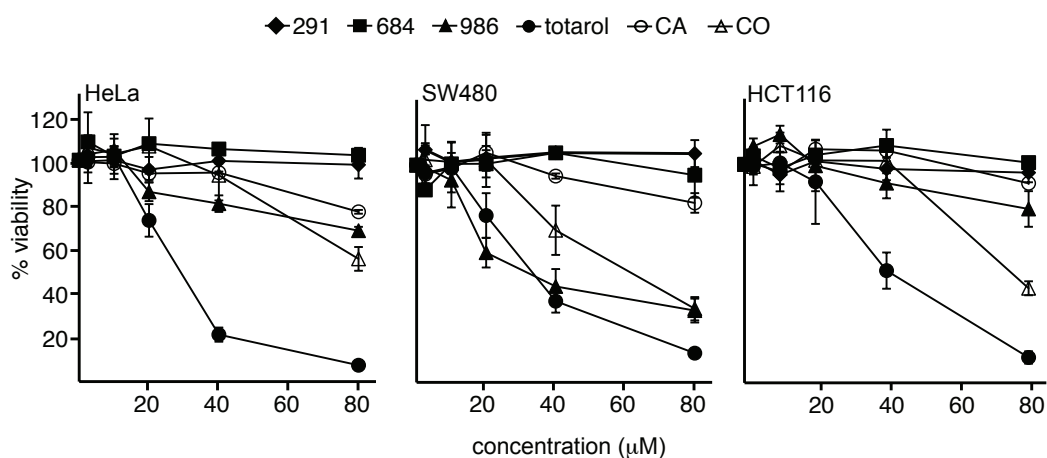

### Cytotoxicity profiles

HeLa, SW480 and HCT116 cells were seeded in 96-well plates at densities of  $5 \times 10^3$  cells/well and allowed to adhere for 16 hours prior to addition of compounds (at various concentrations, as indicated). After 12 hours, cell numbers were determined with the Cell Counting Kit-8 (Dojindo) according to manufacturer's recommendations, and percent viable cells are shown. Compounds 291, 684 and CA remained non-toxic upon treatment of cells (at 80  $\mu\text{M}$ ) for 24 hours; error bars, standard deviations (n=4).

### Supplementary Figure S12

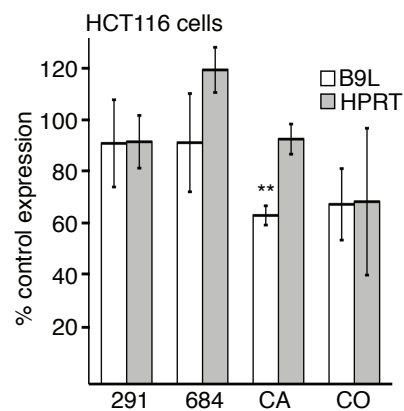

#### Inhibition of *B9L* Wnt target gene expression in HCT116 cells

RT-qPCR analysis of *B9L* and *HPRT* transcript levels, after treatment of HCT116 cells with 25  $\mu$ M of compounds, as indicated. Reduction of transcript levels relative to DMSO-treated controls are shown at the  $P < 0.001$  (\*\*) significance level; error bars, standard deviations (n=4). *AXIN2* expression was not monitored as this gene is known to be hypermethylated in this cell line<sup>54</sup>.



**Supplementary Figure S13**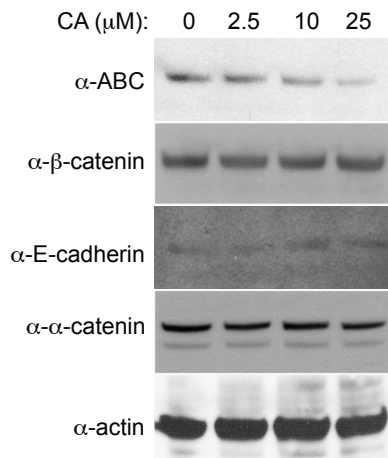**Dose-dependent reduction of active  $\beta$ -catenin levels by CA**

Western blots of total lysates from SW480 cells exposed for 8 hours to increasing concentrations of CA, probed with antibodies as indicated.

**Supplementary Figure S14**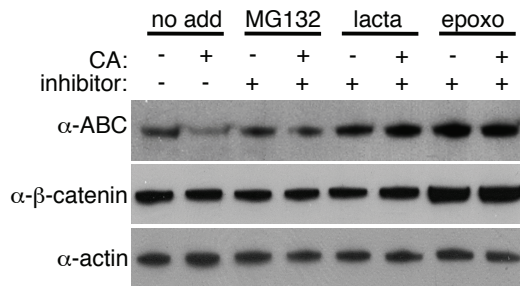**Proteasome inhibitors block  $\beta$ -catenin destabilisation by CA**

Western blots of total lysates from SW480 cells exposed for 4 hours simultaneously to either DMSO vehicle or 25  $\mu$ M CA in the presence of 10  $\mu$ M proteasome inhibitors (lacta, lactacystin; epoxo, epoxomycin), as indicated; Western blots are probed with antibodies as indicated; no add, no addition.

## Supplementary Figure S15

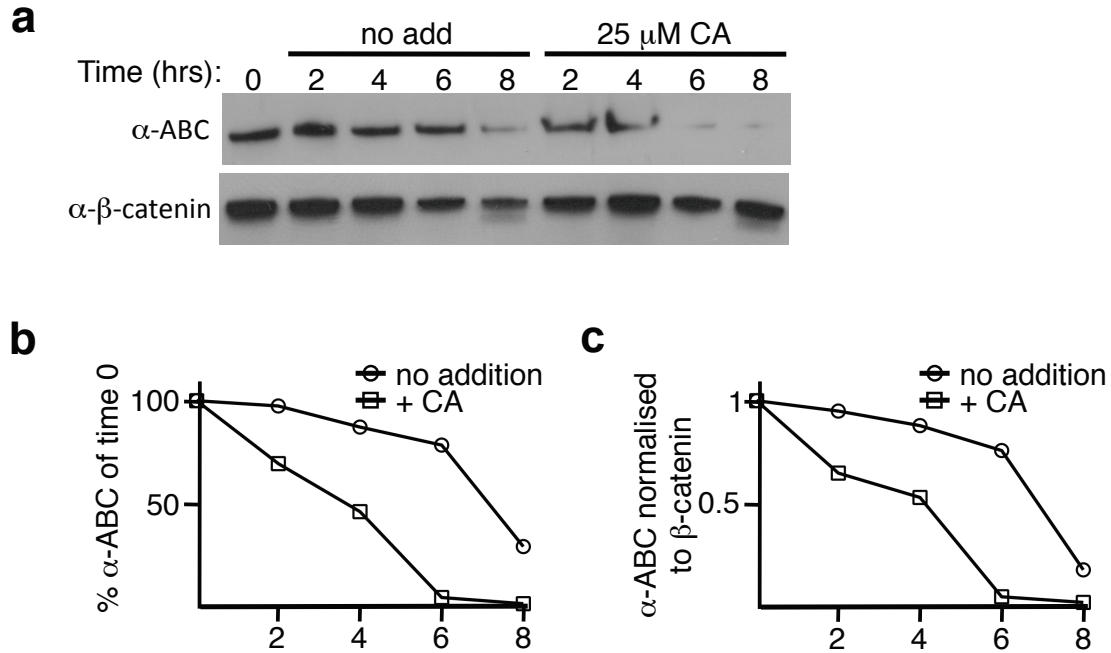

### CA reduces the half-life of active β-catenin in SW480 cells

(a) Western blots of total lysates from SW480 cells in the presence of 100 μg/ml cycloheximide, mock-treated or treated with 25 μM CA, and probed with antibodies as indicated; no add, no addition. (b, c) Densitometry analysis of lanes 2-9 as a percentage of (b) total levels of unphosphorylated β-catenin (α-ABC, lane 1 in a) at time 0, or (c) additionally normalised to total β-catenin levels (α-β-catenin lanes in a).

## Supplementary Figure S16

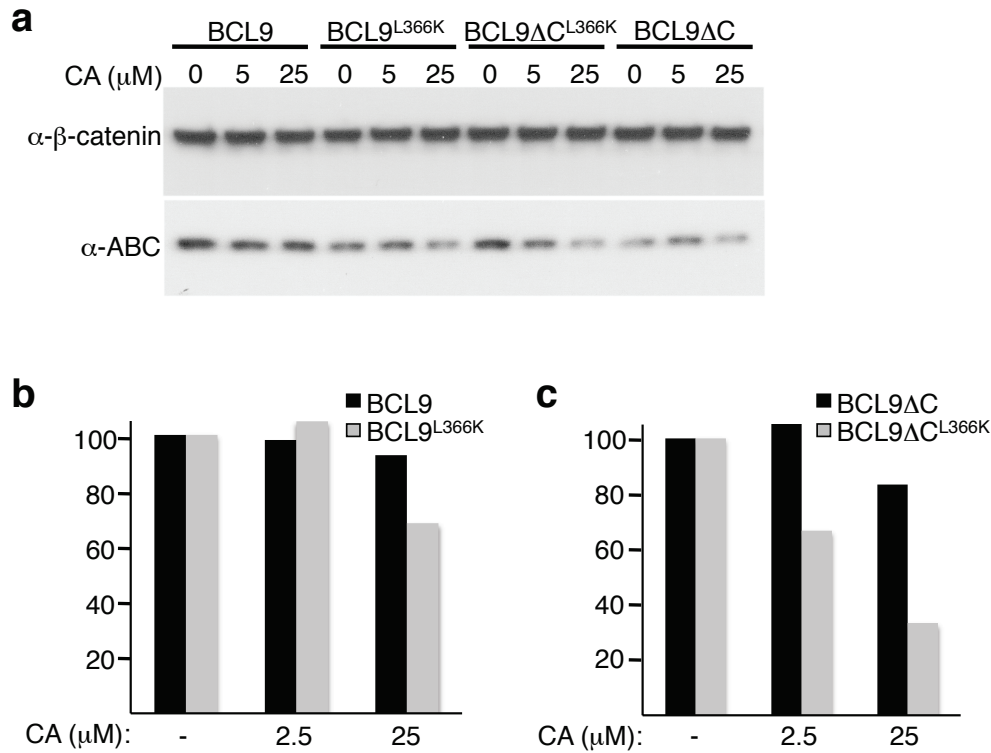

### BCL9 antagonises the reduction of active $\beta$ -catenin by CA

(a) Western blots of total lysates from SW480 cells, transfected with wt and mutant FLAG-BCL9 constructs as indicated, treated with increasing concentrations of CA for 8 hours, and probed with antibodies as indicated. (b, c) Densitometry analysis of (b) lanes 1-6 and (c) lanes 7-12; black columns, total  $\beta$ -catenin levels; grey columns, unphosphorylated  $\beta$ -catenin levels.

**Supplementary Table S1**

| statistics           | LOPAC screen | Phytopure screen | MRCT Screen |
|----------------------|--------------|------------------|-------------|
| average Z            | 0.35         | 0.32             | 0.70        |
| # of compounds       | 1280         | 1280             | 45'000      |
| percent hit rate     | 2.5% (32)    | 3.8% (49)        | 0.024% (12) |
| # of discarded hits  | 32           | 46               | 12          |
| % confirmed hits (#) | 0% (0)       | 0.15% (3)        | 0% (0)      |

**Screen statistics**

Discarded hits, hits that scored in the counter-screen; confirmed hits, hits negative in the counter-screen. Due to the low average  $Z'$  value, the LOPAC and Phytopure screens were performed twice, which identified the same initial hits. The screen of the MRCT library (containing 45'000 drug-like compounds of <350 MW, <3 H-bond donors, <6 H-bond acceptors, <6 rotatable bonds, cLogP of 1-4 and a polar surface area <120) was performed with a luminescent-based detection method (see **Supplementary Figure S2**), which greatly improved the average  $Z'$  value.

**Supplementary Table S2**

| Compound ID | K <sub>i</sub> (μM) |          |
|-------------|---------------------|----------|
|             | ARD-HD2             | ARD-nTCF |
| 986         | 4.8 ± 1.0           | 90 ± 22  |
| 291         | 0.9 ± 0.8           | n.d.     |
| 684         | 6.3 ± 2.7           | n.d.     |
| CO          | 8.2 ± 4.3           | 23 ± 15  |
| CA          | 3.3 ± 1.8           | n.d.     |

**Inhibitor constants**

K<sub>i</sub> values for inhibition of the ARD-HD2 and ARD-nTCF interactions by the compounds used in this study, with standard deviations (±) indicated; n.d., not detected.

### Supplementary Table S3

| protein                  | K <sub>d</sub> (μM) |
|--------------------------|---------------------|
| β-catenin <sup>ARD</sup> | 0.66 ± 0.16         |
| R4                       | 0.59 ± 0.15         |
| R4 <sup>ΔH1</sup>        | 0.35 ± 0.17         |

\* 0.465 ± 0.035

#### Binding constants of HisS-HD2 to various ARD constructs

K<sub>d</sub> values for the binding of fluorescently-labelled HisS-HD2 to ARD, R4 and R4<sup>ΔH1</sup>, as derived from fluorescence anisotropy measurements, with standard deviations (±) indicated. HisS-HD2 (500 μM) was N-terminally labelled with fluorescein by incubation with 100-fold molar excess of carboxyfluorescein succinimidyl ester reagent in PBS (pH 6.8). After 1 hour, the fluorescently labelled HisS-HD2 was extensively dialysed against PBS (pH 6.8) to remove free label. Fluorescence anisotropy measurements were performed at 20°C with a Cary Eclipse Varian fluorescence spectrophotometer equipped with a Hamilton Microlab M dispenser. Reactions were carried out by titration of His-R4, His-R4<sup>ΔH1</sup> or ARD into 1 ml of PBS (pH 6.8) containing 20 nM fluorescently labelled HisS-HD2. \* For comparison, a K<sub>d</sub> of 0.465 ± 0.035 μM was previously determined (by ITC) for HD2 binding to ARD<sup>18</sup>.

Supplementary Table S4

|                             | <b>3SLA</b>                | <b>3SL9</b>              |
|-----------------------------|----------------------------|--------------------------|
| <b>Data collection</b>      |                            |                          |
| Space group                 | P 41 21 2                  | C2                       |
| Cell dimensions             |                            |                          |
| $\alpha, b, c$ (Å)          | 90.79 90.79 364.34         | 160.89 80.70 87.94       |
| $\alpha, \beta, \gamma$ (°) | 90.00 90.00 90.00          | 90.00 102.00 90.00       |
| Resolution                  | 64.51 – 2.51 (2.61 – 2.51) | 32.07 – 2.2 (2.32 – 2.2) |
| R merge                     | 0.08 (0.9)                 | 0.05 (0.25)              |
| $I/\sigma$                  | 11.1 (1.6)                 | 17.1 (5.3)               |
| Completeness (%)            | 99.0 (99.3)                | 97 (97.2)                |
| Redundancy                  | 5.7 (5.4)                  | 3.8 (3.8)                |
| <b>Refinement</b>           |                            |                          |
| Resolution (Å)              | 40.71 – 2.5                | 29.4 – 2.2               |
| Number of reflections       | 50'801                     | 51'571                   |
| $R_{work}/R_{free}$         | 0.20/0.26                  | 0.20/0.26                |
| Number of atoms             |                            |                          |
| Protein                     | 5938                       | 5517                     |
| Ligand/ion                  | 0/50                       | 0/144                    |
| Water                       | 86                         | 152                      |
| <b>B-factors</b>            |                            |                          |
| Protein                     | 59.46                      | 36.98                    |
| Ligand/ion                  | 0/61.14                    | 0/40.31                  |
| Water                       | 63.02                      | 43.85                    |
| R.m.s. deviations           |                            |                          |
| Bond lengths (Å)            | 0.02                       | 0.02                     |
| Bond angles (°)             | 1.9                        | 2.1                      |

|             | <b>3SLA</b> | <b>3SL9</b> | <b>2GL7</b> | <b>2BCT</b> |
|-------------|-------------|-------------|-------------|-------------|
| <b>3SLA</b> | 0           |             |             |             |
| <b>3SL9</b> | 0.41        | 0           |             |             |
| <b>2GL7</b> | 0.43        | 0.42        | 0           |             |
| <b>2BCT</b> | 0.54        | 0.40        | 0.49        | 0           |

### X-ray data collection and refinement statistics

Above, collection and refinement statistic of crystallographic data; data were processed with Mosflm<sup>55</sup> and scaled with Scala<sup>56</sup>; structures were refined with Refmac<sup>57</sup>, and the models were updated with Coot<sup>58</sup>; analysis of structures was done with CCP4i programs<sup>59</sup>. Below, rmsd values for the core C $\alpha$  backbones between 3SLA (R4) and 3SL9 (R4-HD2) and the corresponding segments of 2GL7 (ARD-HD2-nTCF)<sup>18</sup> and 2BCT (ARD)<sup>19</sup>.



## Supplementary Table S5

| PDB no.     | $\beta$ -catenin domain  | Ligand                          | Unresolved amino acids in $\beta$ -catenin (H1, bold) | Reference                |
|-------------|--------------------------|---------------------------------|-------------------------------------------------------|--------------------------|
| 2BCT        | ARD, 134-671             | none                            | <b>134-149</b> , 550-563                              | Huber et al., 1997       |
| 3BCT        | ARD, 134-671             | none                            | <b>134-149</b> , 550-562                              | Huber et al., 1997       |
| 2Z6H        | ARD + C-term, 138-781    | none                            | <b>138-148</b> , 551-560, 692-781                     | Xing et al., 2008        |
| <b>1I7X</b> | ARD, 134-671             | E-cadherin, 577-728             | 134-137, 553-559, 666-670                             | Huber and Weis, 2001     |
| 1M1E        | ARD, 134-671             | hICAT, 1-81                     | <b>134-150</b> , 550-558                              | Daniels and Weis, 2002   |
| 1LUJ        | ARD, 134-664             | hICAT, 1-81                     | <b>134-150</b> , 550-562, 664-671                     | Graham et al., 2002      |
| 1JDH        | ARD, 134-664             | hTCF4, 1-53                     | <b>141-150</b> , 549-559                              | Graham et al., 2001      |
| 1JPW        | hARD, 134-668            | hTCF4, 8-54                     | <b>131-150</b> , 550-559, 663-670                     | Poy et al., 2001         |
| <b>2GL7</b> | ARD, 138-686, Y142E      | hBCL9, 347-392 and hTCF4, 1-53  | 137-141, 551-559, 664-686                             | Sampietro et al., 2006   |
| <b>1DOW</b> | 118-151, fused to ligand | $\alpha$ -catenin, 57-261       | 150, 151                                              | Pokutta and Weis, 2000   |
| <b>1QZ7</b> | hARD, 133-665            | XAxin, 435-504                  | 133-141                                               | Xing et al., 2003        |
| <b>1G3J</b> | ARD, 133-664             | XTcf3, 1-53                     | 133, 551-559                                          | Graham et al., 2000      |
| 1TH1        | ARD, 133-665             | hAPC, 1362-1540                 | <b>133-144</b> , 553-558                              | Xing et al., 2004        |
| 1T08        | ARD, 134-671             | hICAT, 1-81 and hAPC, 1484-1498 | <b>134-150</b> , 551-558                              | Ha et al., 2004          |
| 1V18        | ARD, 134-671             | Phospho-hAPC, 1484-1498         | <b>134-149</b> , 551-558                              | Ha et al., 2004          |
| 1JPP        | ARD, 134-671             | hAPC, 1021-1035                 | <b>134-150</b> , 547-560, 664-671                     | Eklof Spink et al., 2001 |
| 2Z6G        | D. rerio, 1-781          | none                            | <b>138-148</b> , 551-560, 692-781                     | Xing et al., 2008        |
| 3SLA        | ARD 141-306              | none                            | <b>141-149</b>                                        | present study            |
| <b>3SL9</b> | ARD 141-306              | hBCL9 347-392                   |                                                       | present study            |

Structured  $\beta$ -catenin residues in reported X-ray structures

Listing of the published X-ray structures of vertebrate  $\beta$ -catenin fragments (including residue numbers), with or without ligand<sup>18, 19, 22, 23, 34, 60-</sup>

<sup>68</sup>. Unless otherwise stated, residue numbers refer to the murine proteins; h, human; X, Xenopus. In bold are the H1 residues (plus upstream flanking residues if included) that are not visible in the structures; red indicates structures of ARD complexes in which H1 is helical. Residues 141-150, H1 of ARD repeat 1; residues 550-560, insert in ARD repeat 10; 664-783, C-terminal region.

## SUPPLEMENTARY REFERENCES

- 54 Koinuma, K. et al. Epigenetic silencing of AXIN2 in colorectal carcinoma with microsatellite  
instability. *Oncogene* **25**, 139-146 (2006).
- 55 Leslie, A. G. The integration of macromolecular diffraction data. *Acta Crystallogr. D Biol.*  
*Crystallogr.* **62**, 48-57 (2006).
- 56 Evans, P. Scaling and assessment of data quality. *Acta Crystallogr. D Biol. Crystallogr.* **62**, 72-  
82 (2006).
- 57 Murshudov, G. N., Vagin, A. A. & Dodson, E. J. Refinement of macromolecular structures by  
the maximum-likelihood method. *Acta Crystallogr. D Biol. Crystallogr.* **53**, 240-255 (1997).
- 58 Emsley, P. & Cowtan, K. Coot: model-building tools for molecular graphics. *Acta Crystallogr.*  
*D Biol. Crystallogr.* **60**, 2126-2132 (2004).
- 59 Potterton, E., Briggs, P., Turkenburg, M. & Dodson, E. A graphical user interface to the CCP4  
program suite. *Acta Crystallogr. D Biol. Crystallogr.* **59**, 1131-1137 (2003).
- 60 Xing, Y. et al. Crystal structure of a full-length  $\beta$ -catenin. *Structure* **16**, 478-487 (2008).
- 61 Daniels, D. & Weis, W. I. ICAT inhibits  $\beta$ -catenin binding to Tcf/Lef-family transcription  
factors and the general coactivator p300 using independent structural modules. *Mol. Cell* **10**,  
573-584 (2002).
- 62 Graham, T. A., Clements, W. K., Kimelman, D. & Xu, W. The crystal structure of the  $\beta$ -  
catenin/ICAT complex reveals the inhibitory mechanism of ICAT. *Mol. Cell* **10**, 563-571  
(2002).
- 63 Graham, T. A. et al. Crystal structure of a  $\beta$ -catenin/Tcf complex. *Cell* **103**, 885-896 (2000).
- 64 Graham, T. A. et al. Tcf4 can specifically recognize  $\beta$ -catenin using alternative conformations.  
*Nat. Struct. Biol.* **8**, 1048-1052 (2001).
- 65 Xing, Y., Clements, W. K., Kimelman, D. & Xu, W. Crystal structure of a  $\beta$ -catenin/axin  
complex suggests a mechanism for the  $\beta$ -catenin destruction complex. *Genes Dev.* **17**, 2753-  
2764 (2003).
- 66 Xing, Y. et al. Crystal structure of a  $\beta$ -catenin/APC complex reveals a critical role for APC  
phosphorylation in APC function. *Mol. Cell* **15**, 523-533 (2004).
- 67 Ha, N. C. et al. Mechanism of phosphorylation-dependent binding of APC to  $\beta$ -catenin and its  
role in  $\beta$ -catenin degradation. *Mol. Cell* **15**, 511-521 (2004).
- 68 Eklof Spink, K., Fridman, S. G. & Weis, W. I. Molecular mechanisms of  $\beta$ -catenin recognition  
by adenomatous polyposis coli revealed by the structure of an APC- $\beta$ -catenin complex. *EMBO*  
*J.* **20**, 6203-6212 (2001).
